# Supplementary material for: Self-assembled CdS quantum dots in carbon nanotubes: induced polysulfide trapping and redox kinetics enhancement for improved lithium–sulfur battery performance
Source: Royal Society of Chemistry journal article supplement (doi:10.1039/c8ta09906e), 2018-12-05
Supplement: c8ta09906e1.pdf [file c8ta09906e1.pdf]

# **Self-assembled CdS Quantum Dots in Carbon Nanotubes-Induced Polysulfide Trapping and Redox Kinetics Enhancing for Lithium-Sulfur Battery Performance Improvement**

*Dong Cai,<sup>a</sup> Lili Wang,<sup>\*b</sup> La Li,<sup>a</sup> Yupu Zhang,<sup>a</sup> Junzhi Li,<sup>a</sup> Haoran Tu,<sup>d</sup> and Wei Han,<sup>a,c\*</sup>*

*a. Jilin Supercapacitor Engineering Laboratory, College of Physics, Jilin University*

*Changchun City 130012, P.R. China.*

*b. State Key Laboratory on Integrated Optoelectronics, College of Electronic Science and Engineering, Jilin University, Changchun 130012, PR China*

*\*Email: lili\_wang@jlu.edu.cn*

*c. International Center of Future Science, Jilin University, Changchun City 130012, PR China.*

*\*E-mail: whan@jlu.edu.cn*

*d. Key Laboratory of Physics and Technology for Advanced Batteries (Ministry of Education), College of Physics, Jilin University, Changchun 130012, PR China*

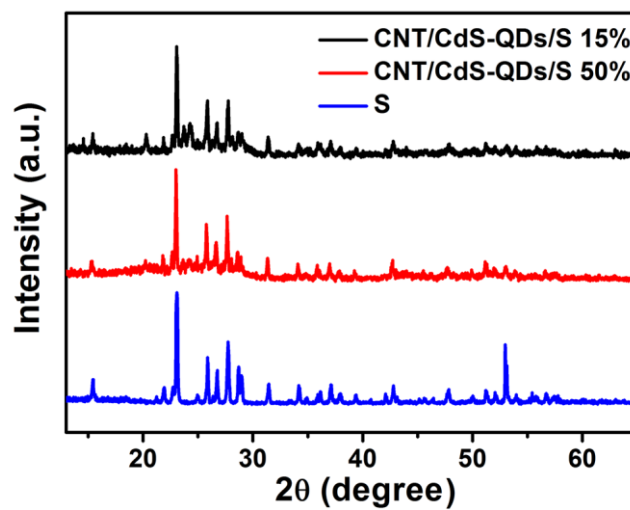

**Figure S1** XRD patterns of the S, CNT/CdS-QDs/S 15%, and CNT/CdS-QDs/S 50% composite.

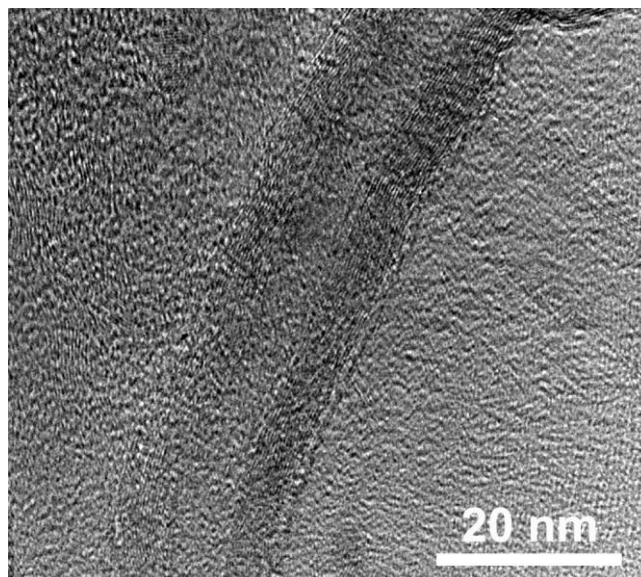

**Figure S2** HRTEM image of acidified CNT at a scale of 20 nm.

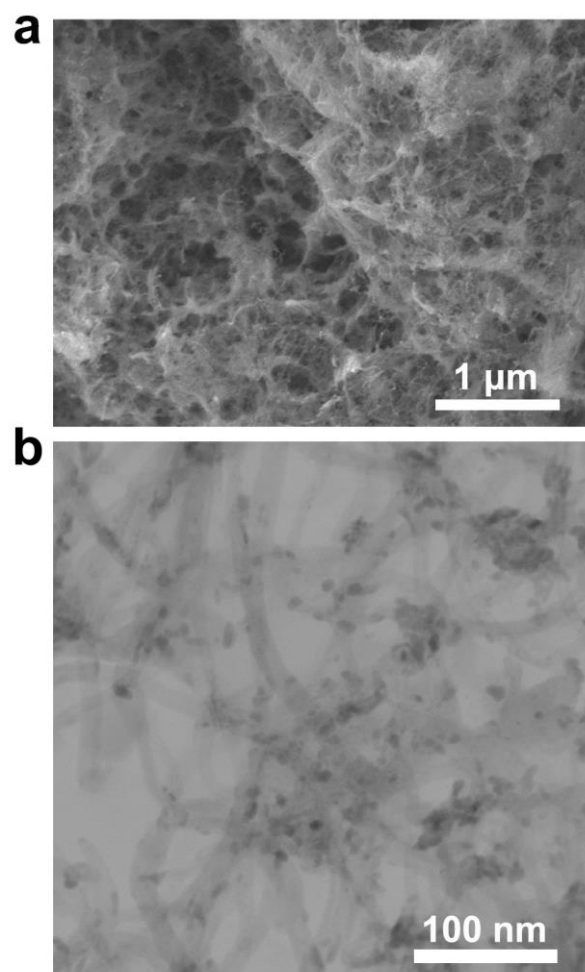

**Figure S3** SEM (a) and STEM (b) images of CNT/CdS-QDs composite.

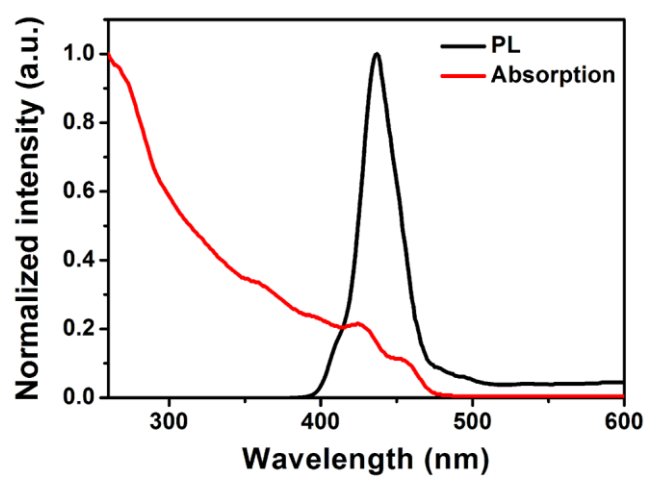

**Figure S4** The absorption and photoluminescence spectra of CdS-QDs.

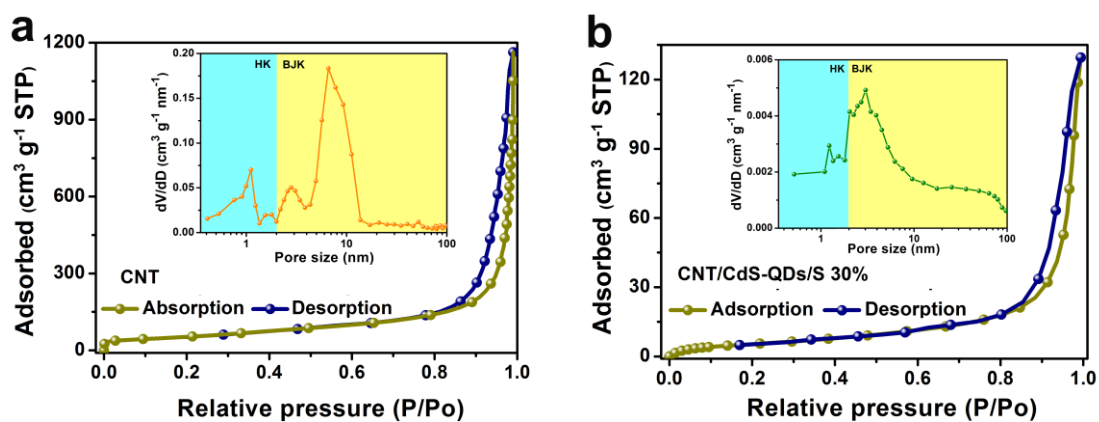

**Figure S5** The nitrogen adsorption-desorption isotherms and pore size distribution curves of the acidified CNT (a) and CNT/CdS-QDs/S 30% (b).

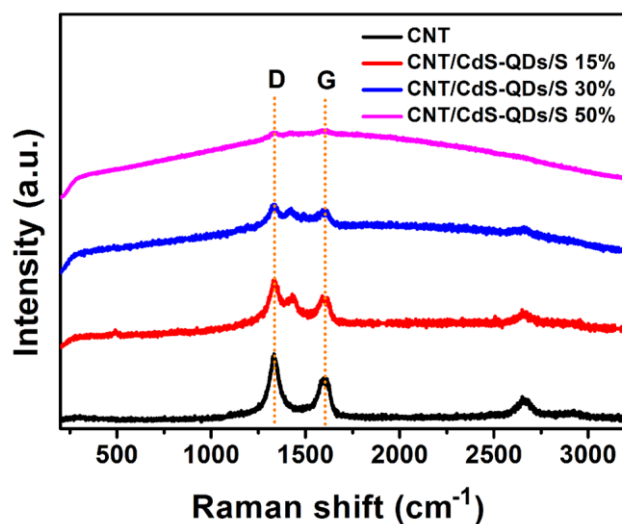

**Figure S6** The Raman spectra of CNT, CNT/CdS-QDs/S 15%, CNT/CdS-QDs/S 30%, and CNT/CdS-QDs/S 50%.

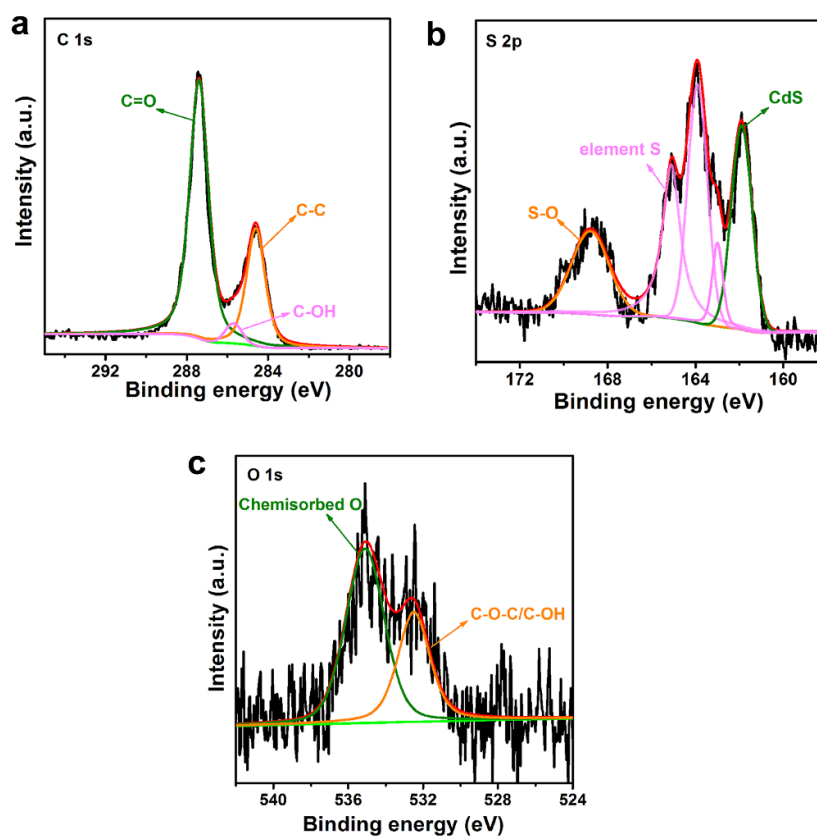

**Figure S7** The C 1s (a), S 2p (b), and O 1s (c) XPS spectra of CNT/CdS-QDs/S 30% composite.

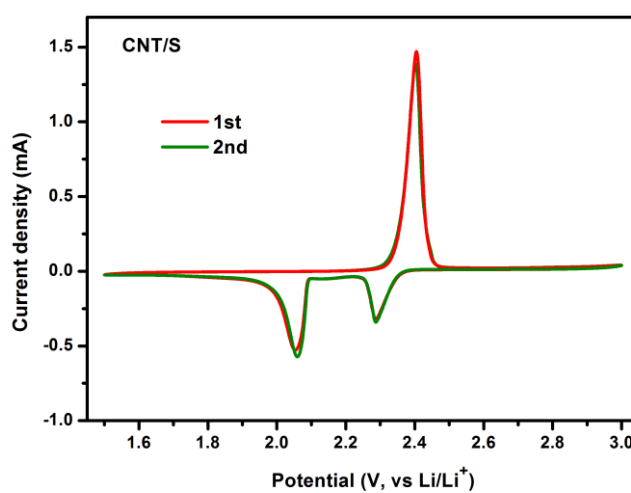

**Figure S8** The CV curves of CNT/ S composite for the first few cycles at a scan rate of 0.1 mV s<sup>-1</sup>.

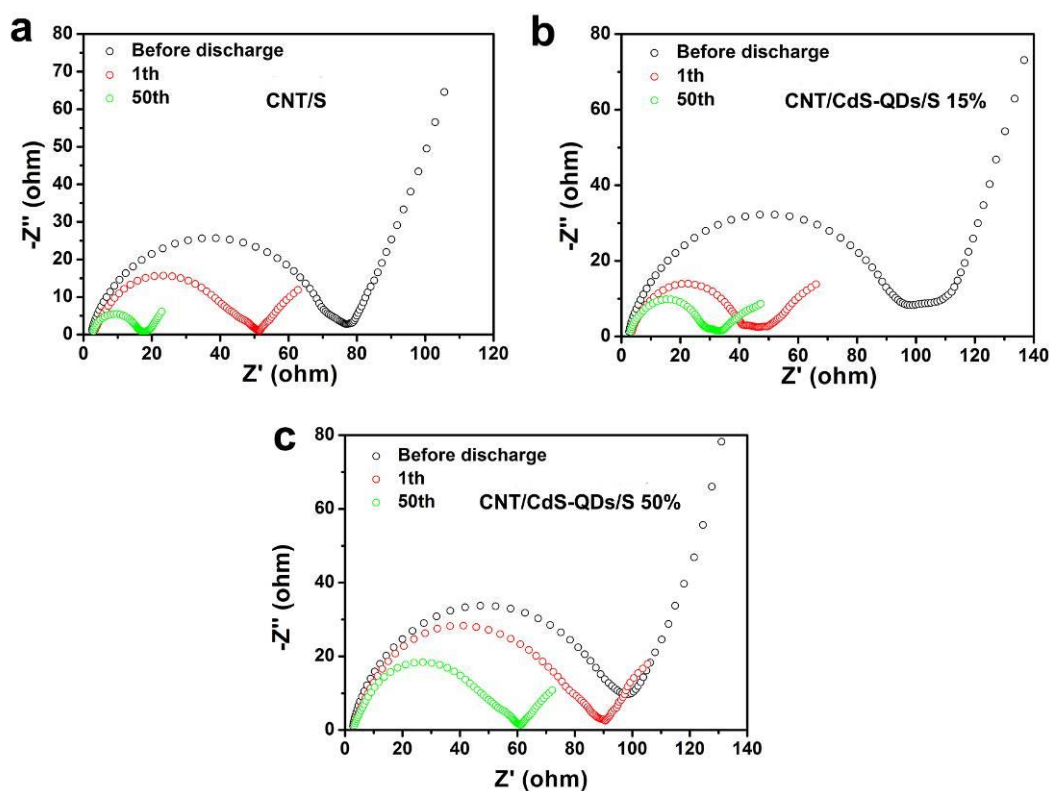

**Figure S9** Nyquist plots of CNT/S (a), CNT/CdS-QDs/S 15% (b), and CNT/CdS-QDs/S 50% (c) electrode under different circumstances in the 0.5 C cycling process.

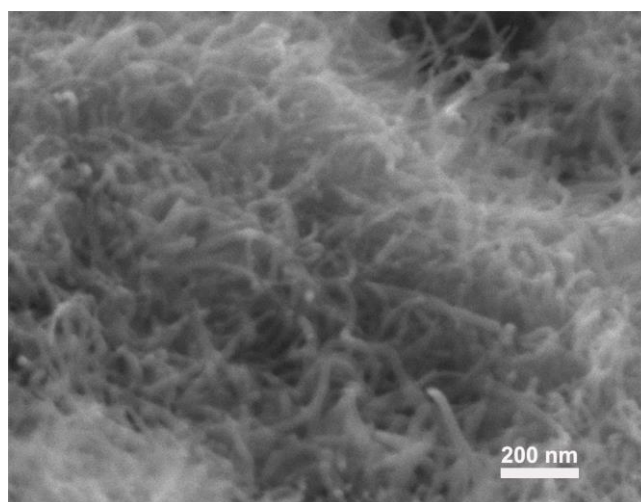

**Figure S10** The SEM image of the CNT/CdS-QDs/S 30% cathode after 150 cycles at 0.5 C.
